# Supplementary material for: Harnessing CoS@MoS2 Heterostructures for High Performance Glucose Biosensors: Towards Next-Generation Glucometers
Source: Research Square preprint supplement (doi:10.21203/rs.3.rs-6944932/v1), 2025-07-04
Supplement: Supplementary file 1 [file cc4fcfee5242f39a23bd5a14.docx]

**Supplementary Information File**

**Harnessing CoS@MoS2 Heterostructures for High Performance Glucose Biosensors: Towards Next-Generation Glucometers**

*Israr U. Hassan1, Mustri Bano*1, Fatima Ba Omar1, Aarif H. Pinjari2, Gowhar A. Naikoo*1*

*1Department of Mathematics and Sciences, College of Arts and Applied Sciences, Dhofar University, PC 211, Salalah, Oman*

*2Government College Harsud, District Khandwa, M. P. 450116, India*

Correspondence at: [mustribano1@gmail.com](mailto:mustribano1@gmail.com) and [gahmed@du.edu.om](mailto:gahmed@du.edu.om)


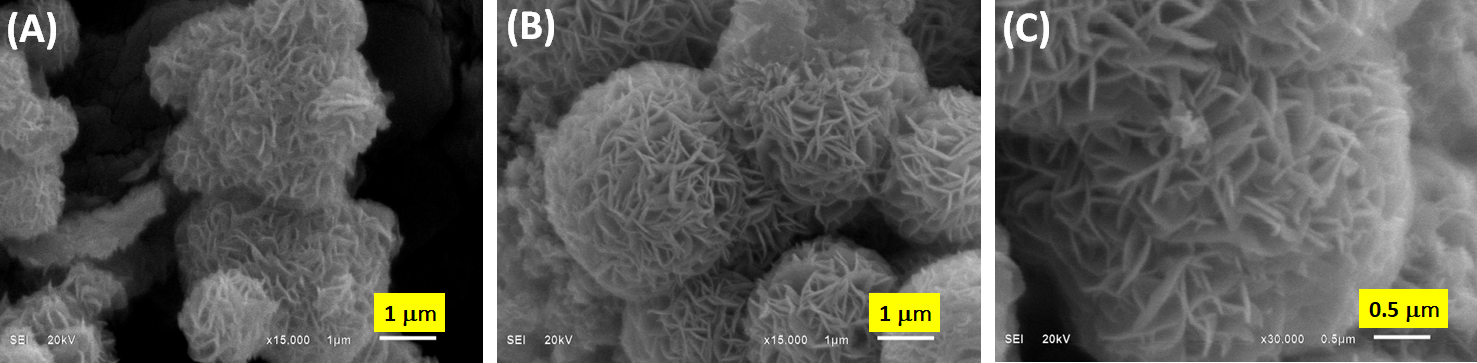


**Figure S1**. SEM images for (A) MoS2 (B) 2D–CoS@MoS2 (C) 2D–CoS@MoS2.


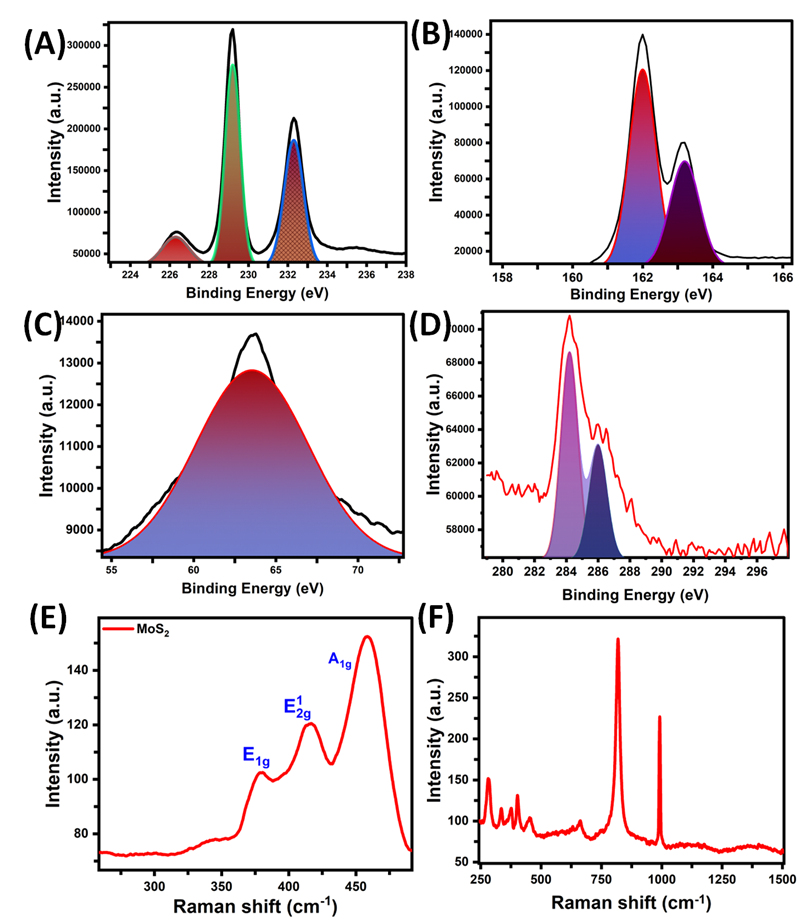


**Figure S2**. XPS (A)Mo 3d, (B) S 2p (C) Co 3d, (D) C 2p and in CoS@MoS2 spectra, Raman Spectra of (E) MoS2 and (F) CoS@MoS2.

**Table S1.** Summarizes the results of glucose infusions into blood serum samples from diabetic and non-diabetic people, and its recovery data.

| **Blood serum sample response of diabatic person** | **Added (mM)** | **Found Concentration (mM)** | **Mean Recovery (%)** | **RSD**  **(%, n=3)** |
| --- | --- | --- | --- | --- |
| 0.01 | 0.0142 | 96.30 | 0.0266 |
| 0.05 | 0.0514 | 94.50 | 0.0078 |
| 0.10 | 0.1023 | 99.92 | 0.0034 |
| 0.15 | 0.1495 | 99.58 | 0.0019 |
| 0.2 | 0.1989 | 99.30 | 0.0093 |
| **Blood serum sample response of non-diabatic person** | **Added (mM)** | **Found Concentration (mM)** | **Mean Recovery (%)** | **RSD**  **(%, n=3)** |
| 0.01 | 0.0093 | 99.99 | 0.0036 |
| 0.05 | 0.0492 | 99.98 | 0.0025 |
| 0.1 | 0.0976 | 99.77 | 0.0036 |
| 0.15 | 0.1485 | 99.63 | 0.0014 |
| 0.2 | 0.1972 | 99.99 | 0.0010 |

**Table S2.** Summarizes the results of glucose infusions into urine samples from diabetic and non-diabetic persons, and its recovery data.

| **Urine sample response of diabatic person** | **Added (mM)** | **Found Concentration (mM)** | **Mean Recovery (%)** | **RSD**  **(%, n=3)** |
| --- | --- | --- | --- | --- |
| 0.01 | 0.0096 | 99.98 | 0.0001 |
| 0.05 | 0.0789 | 99.97 | 0.0019 |
| 0.09 | 0.1006 | 99.98 | 0.0026 |
| 0.13 | 0.1965 | 99.99 | 0.0019 |
| 0.15 | 0.1485 | 99.99 | 0.0015 |
| **Urine sample response of non-diabatic person** | **Added (mM)** | **Found Concentration (mM)** | **Mean Recovery (%)** | **RSD**  **(%, n=3)** |
| 0.01 | 0.0120 | 99.98 | 0.0002 |
| 0.05 | 0.0512 | 99.96 | 0.0005 |
| 0.09 | 0.0868 | 99.95 | 0.0012 |
| 0.13 | 0.1004 | 99.99 | 0.0018 |
| 0.18 | 0.1795 | 99.97 | 0.0019 |
